# Supplementary material
Source: bioRxiv or medRxiv preprint supplement (https://medrxiv.org/highwire/filestream/70289/field_highwire_adjunct_files/0/19012781-1.pdf)
Supplement: Supplementary file [file 19012781-1.pdf]

**Supplementary Table 1:** Baseline characteristics of the adult resident population – overall and by measurement and outcome status. Each column is a subset of the former. Metrics are in N (%).

|                                        | <b>Enumerated adult population (N=79,818)</b> | <b>HIV serostatus known (N=71,402)</b> | <b>HIV-positive serostatus (N=7009)</b> | <b>Viral load measured (N=5332)</b> |
|----------------------------------------|-----------------------------------------------|----------------------------------------|-----------------------------------------|-------------------------------------|
| Region                                 |                                               |                                        |                                         |                                     |
| Western Uganda                         | 25305 (32)                                    | 23383 (33)                             | 1469 (21)                               | 1076 (20)                           |
| Eastern Uganda                         | 26162 (33)                                    | 23500 (33)                             | 762 (11)                                | 586 (11)                            |
| Kenya                                  | 28351 (36)                                    | 24519 (34)                             | 4778 (68)                               | 3670 (69)                           |
| Male sex                               | 36048 (45)                                    | 31311 (44)                             | 2350 (34)                               | 1733 (33)                           |
| Age category                           |                                               |                                        |                                         |                                     |
| 15-19 yr                               | 16991 (21)                                    | 15080 (21)                             | 229 (3)                                 | 167 (3)                             |
| 20-29 yr                               | 22220 (28)                                    | 19649 (28)                             | 1865 (27)                               | 1378 (26)                           |
| 30-39 yr                               | 14884 (19)                                    | 13357 (19)                             | 2261 (32)                               | 1721 (32)                           |
| 40-49 yr                               | 10005 (13)                                    | 9079 (13)                              | 1506 (21)                               | 1160 (22)                           |
| 50-59 yr                               | 7011 (9)                                      | 6333 (9)                               | 764 (11)                                | 616 (12)                            |
| ≥60+ yr                                | 8707 (11)                                     | 7904 (11)                              | 384 (5)                                 | 290 (5)                             |
| Marital status <sup>a</sup>            |                                               |                                        |                                         |                                     |
| Single                                 | 23692 (30)                                    | 20314 (28)                             | 501 (7)                                 | 352 (7)                             |
| Married                                | 46684 (58)                                    | 42417 (59)                             | 4813 (69)                               | 3647 (68)                           |
| Widowed/divorced/separated             | 9228 (12)                                     | 8465 (12)                              | 1688 (24)                               | 1327 (25)                           |
| Education level <sup>b</sup>           |                                               |                                        |                                         |                                     |
| Below primary                          | 50912 (64)                                    | 46413 (65)                             | 5258 (75)                               | 4067 (76)                           |
| Completed primary                      | 11478 (14)                                    | 10095 (14)                             | 814 (12)                                | 602 (11)                            |
| Any secondary or higher                | 17266 (22)                                    | 14759 (21)                             | 921 (13)                                | 650 (12)                            |
| Occupation <sup>c</sup>                |                                               |                                        |                                         |                                     |
| Formal                                 | 19753 (25)                                    | 16884 (24)                             | 362 (5)                                 | 257 (5)                             |
| High-risk informal                     | 3235 (4)                                      | 2762 (4)                               | 678 (10)                                | 383 (7)                             |
| Low-risk informal                      | 48753 (61)                                    | 44738 (63)                             | 5193 (74)                               | 4133 (78)                           |
| Other                                  | 3864 (5)                                      | 3308 (5)                               | 387 (6)                                 | 288 (5)                             |
| No job                                 | 3992 (5)                                      | 3500 (5)                               | 384 (5)                                 | 266 (5)                             |
| Household wealth quintile <sup>d</sup> |                                               |                                        |                                         |                                     |
| First, least wealth                    | 12078 (15)                                    | 10952 (15)                             | 1109 (16)                               | 827 (16)                            |
| Second                                 | 13474 (17)                                    | 12188 (17)                             | 1147 (16)                               | 914 (17)                            |
| Third                                  | 15448 (19)                                    | 13932 (20)                             | 1260 (18)                               | 979 (18)                            |
| Fourth                                 | 17384 (22)                                    | 15507 (22)                             | 1535 (22)                               | 1184 (22)                           |
| Fifth, most wealth                     | 21235 (27)                                    | 18636 (26)                             | 1854 (26)                               | 1392 (26)                           |

<sup>a</sup>Marital status missing for N=214 (0.3%); <sup>b</sup>Education level missing for n=162 (0.2%); <sup>c</sup>Formal sector was a teacher, student, government worker, military worker, health worker, or factory worker. High-risk informal was a fishmonger, fisher, bar owner, bar worker, transportation worker, or tourism worker. Low-risk informal was a farmer, shopkeeper, market vendor, hotel worker, homemaker, household worker, construction worker, or miner. Occupation missing for N=221 (0.3%). <sup>d</sup>Household wealth quintile determined through principle component analysis; missing for N=199 (0.2%).
